# Supplementary material for: Synthetic possibility of polystyrene functionalization based on hydroxyl groups of graphene oxide as nucleophiles
Source: Royal Society of Chemistry journal article supplement (doi:10.1039/c5nj00815h), 2015-01-01
Supplement: c5nj00815h1.pdf [file c5nj00815h1.pdf]

## Supporting Information

### **Synthetic possibility of polystyrene functionalization based on hydroxyl groups of graphene oxide as nucleophile**

Rongbing Yu,<sup>a</sup> Shupeng Zhang,<sup>a,\*</sup> Yuting Luo,<sup>a</sup> Ruofei Bai,<sup>b</sup> Jiangfang Zhou<sup>a</sup> and Haiou Song<sup>c,\*</sup>

---

<sup>a</sup> School of Chemical Engineering, Nanjing University of Science and Technology, Nanjing, Jiangsu, 210094, China. E-mail: [shupeng\\_2006@126.com](mailto:shupeng_2006@126.com)

<sup>b</sup> College of Chemistry and Chemical Engineering, Luoyang Normal University, Luoyang 471022, PR China

<sup>c</sup> State Key Laboratory of Pollution Control and Resource Reuse, School of the Environment, Nanjing University, Nanjing, Jiangsu, 210023, China , E-mail: [songhaiou2011@126.com](mailto:songhaiou2011@126.com)

#### **1. Characterization**

FT-IR spectra were recorded on a Nicolet IS-10 spectrometer equipped with a Smart OMNI sampler with a high purity Ge crystal. Raman spectra of samples were measured on a LabRAM ARAMIS (HORIBA Jobin Yvon S.A.S.) using an excitation wavelength of 532 nm. XRD analyses were performed on a Bruker D8 Advance diffractometer with Cu-K $\alpha$  radiation. Thermogravimetric analyses (TGA) were performed on a Mettler TGA/SDTA851e thermogravimetric analyzer at a heating rate of 20 °C/min in a dry nitrogen atmosphere.

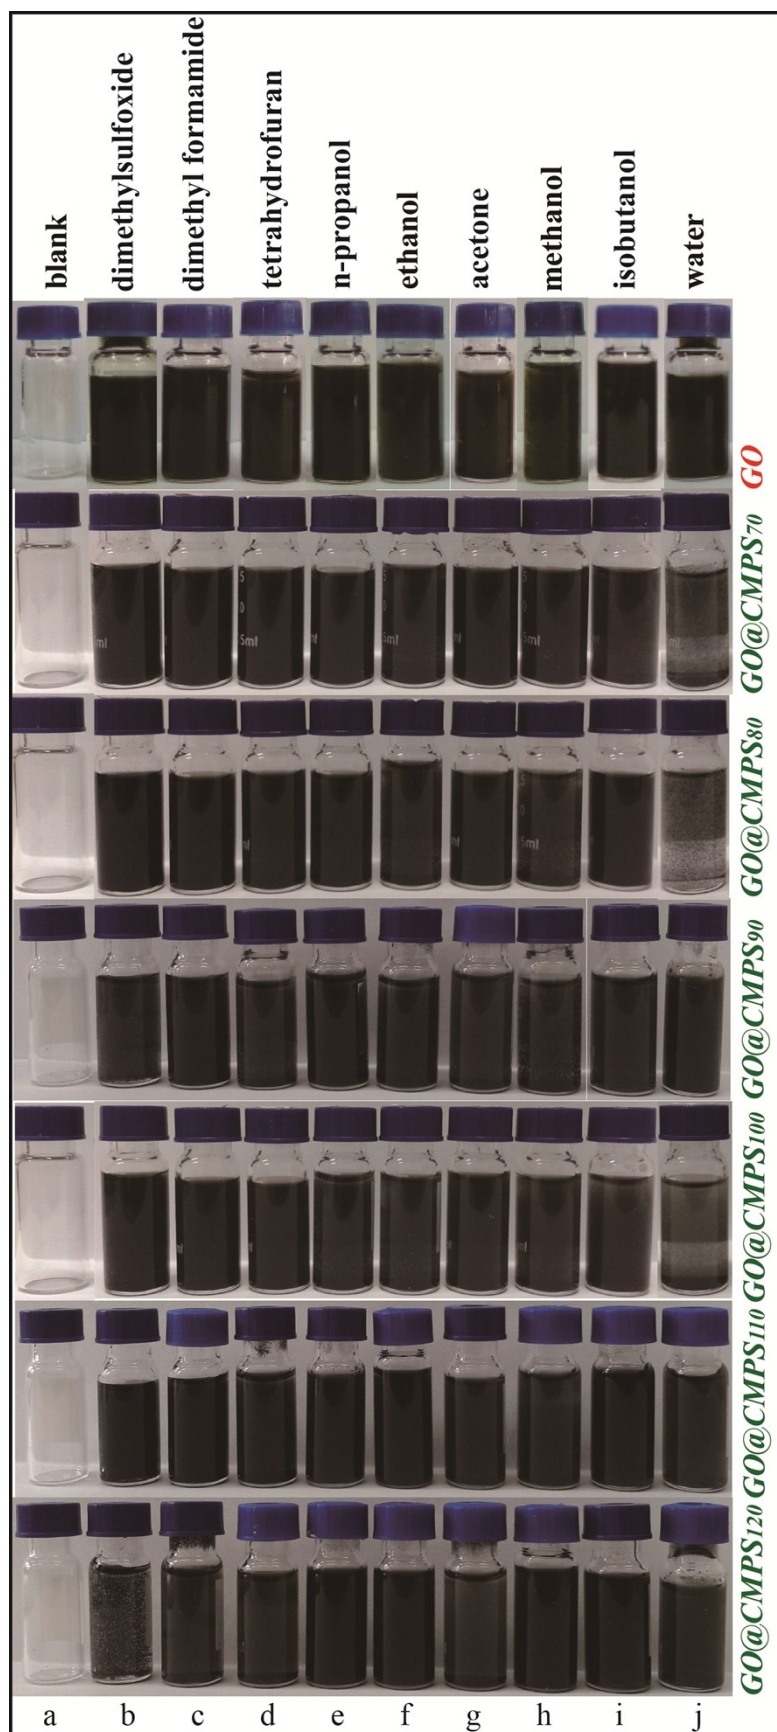

**Fig. S1.** Digital pictures of GO and GO@CMPS dispersed in water and 7 organic solvents through bath ultrasonication
